# Supplementary material for: Tetraacylstannanes as Long‐Wavelength Visible‐Light Photoinitiators with Intriguing Low Toxicity
Source: PubMed Central journal article supplement (PMC6032833; doi:10.1002/chem.201801622), 2018-05-29
Supplement: CHEM-24-8281-s001.pdf [file CHEM-24-8281-s001.pdf]

# CHEMISTRY

## A **European** Journal

### Supporting Information

#### **Tetraacylstannanes as Long-Wavelength Visible-Light Photoinitiators with Intriguing Low Toxicity**

Judith Radebner,<sup>\*[a]</sup> Anna Eibel,<sup>[b]</sup> Mario Leypold,<sup>[a]</sup> Nina Jungwirth,<sup>[a]</sup> Thomas Pickl,<sup>[a]</sup>  
Ana Torvisco,<sup>[a]</sup> Roland Fischer,<sup>[a]</sup> Urs Karl Fischer,<sup>[c]</sup> Norbert Moszner,<sup>[c]</sup> Georg Gescheidt,<sup>[b]</sup>  
Harald Stueger,<sup>[a]</sup> and Michael Haas<sup>\*[a]</sup>

chem\_201801622\_sm\_miscellaneous\_information.pdf

# CONTENT

|                                                          |    |
|----------------------------------------------------------|----|
| Experimental Section.....                                | 2  |
| General Considerations .....                             | 2  |
| Synthesis of <b>1a</b> .....                             | 3  |
| Synthesis of <b>1b</b> .....                             | 3  |
| Analytical Section .....                                 | 4  |
| NMR-Spectroscopy .....                                   | 4  |
| Steady-State Photolysis (SSP) / UV-Vis Spectroscopy..... | 6  |
| CIDNP Spectroscopy .....                                 | 6  |
| X-ray Crystallography.....                               | 7  |
| Photo-DSC.....                                           | 8  |
| Computational Section .....                              | 8  |
| References .....                                         | 31 |

---

# Experimental Section

## General Considerations

All experiments were performed under a nitrogen atmosphere using standard Schlenk techniques. Solvents were dried using a column solvent purification system.<sup>[1]</sup> Commercial KOtBu (97%), 2,4,6-Trimethylbenzoyl chloride (99%) and 2,6-Dimethylbenzoic acid (97%) were used without any further purification.

<sup>1</sup>H (299.95 MHz), <sup>13</sup>C (75.43 MHz) and <sup>29</sup>Si (59.59 MHz) NMR spectra were recorded on a Varian INOVA 300 spectrometer in C<sub>6</sub>D<sub>6</sub> or CDCl<sub>3</sub> solution and referenced versus TMS using the internal <sup>2</sup>H-lock signal of the solvent. Tetrakis(trimethylsilyl)stannane, 2,4,6-Trimethylbenzoyl fluoride and 2,6-Dimethylbenzoyl fluoride were prepared according to published procedures.<sup>[2]</sup>

HRMS spectra were run on a Kratos Profile mass spectrometer. Infrared spectra were obtained on a Bruker Alpha-P Diamond ATR Spectrometer from the solid sample. Melting points were determined using Stuart SMP50 apparatus and are uncorrected. Elemental analyses were carried out on a Hanau Vario Elementar EL apparatus.

CIDNP experiments were carried out on a 200 MHz Bruker AVANCE DPX spectrometer equipped with a custom-made CIDNP probe head. A Hg-Xe UV lamp (Hamamatsu Lightningcure LC4, 3500 mW/cm<sup>2</sup>,  $\lambda_{max}$  = 365 nm) served as the light source. The typical CIDNP timing sequence consists of the following parts: composite pulse presaturation, lamp flash, 90° radiofrequency detection pulse (2.2  $\mu$ s), and FID. "Dummy" CIDNP spectra employing the same pulse sequence but without the lamp pulse were always measured and subtracted from the CIDNP spectra. Samples were prepared in deuterated acetonitrile and deoxygenated by bubbling with argon before the experiment. Chemical shifts ( $\delta$ ) are reported in ppm relative to tetramethylsilane (TMS) using the residual deuterated solvent signals as an internal reference (CD<sub>3</sub>CN,  $\delta_H$  = 1.94 ppm).

UV absorption spectra were recorded on a Perkin Elmer Lambda 5 spectrometer. Photobleaching experiments (steady state photolysis, SSP) were performed on a TIDAS UV- VIS spectrometer (J&M, Germany). Samples (0.6 mM photoinitiator in acetonitrile) were irradiated in a quartz cuvette (1 cm x 1 cm) from the side with a 470 nm LED (Roithner Lasertechnik, Vienna) while UV-Vis spectra were recorded. A spectroradiometer (GL Spectis, GL Optics, Germany) was used to measure the output power of the LED and to ensure an equal photon flux for SSP experiments (13.1 mW, photon flux: 0.05  $\mu$ mol s<sup>-1</sup> at 20 mA, peak wavelength: 462.5 nm).

Materials and Solvents for Spectroscopic Investigations. Bis(acyl)phosphane oxide BAPO Irgacure 819 (**3**) was obtained from TCI. Tetraacylgermanes **2a** and **2b** were synthesized as described previously.<sup>[3]</sup> The monomer butyl acrylate (BA, purity  $\geq$  99.0 %) was obtained from Fluka and freed from stabilizers by passing through a column of basic alumina before use. The solvents acetonitrile (MeCN, Sigma Aldrich,  $\geq$  99.9 %), and CD<sub>2</sub>Cl<sub>2</sub> (Sigma Aldrich, 99.9 %) were employed as received. All experiments were performed at ambient temperature.

Photo-DSC. Experiments were performed on a photo-DSC instrument from Perkin Elmer (DSC 7). All formulations were analyzed in triplicate. After an equilibration phase

(4 min) the samples were irradiated for 3 min with blue LED light (Bluephase Lamp, 1200 mW·cm<sup>-2</sup>, Ivoclar Vivadent AG) at 30°C under constant N<sub>2</sub> flow (20 mL min<sup>-1</sup>). The heat flow of the polymerization reaction was recorded as a function of time. From the theoretical heat of polymerization of the monomer HDDA ( $\Delta H_{0,HDDA} = 761.92 \text{ J g}^{-1}$  or 172.4 kJ mol<sup>-1</sup> determined from 86.2 kJ mol<sup>-1</sup> per acrylate unit)<sup>[4]</sup>. The double bond conversion (DBC) was calculated by dividing the measured heat of polymerization  $\Delta H$  through  $\Delta H_{0,HDDA}$ . The maximum rate of polymerization  $R_{P,max}$  was determined using equation 1, with  $h$  as the height of the exothermic polymerization signal in mW mg<sup>-1</sup> and  $\rho = 1010 \text{ g L}^{-1}$  as the density for HDDA at 25 °C.<sup>[5]</sup>

$$R_{P,max} = \frac{h \times \rho}{\Delta H_{0,HDDA}} \quad (1)$$

## Synthesis of 1a

A solution of (Me<sub>3</sub>Si)<sub>3</sub>SnK in 10 mL of DME was freshly prepared from 1.00 g Sn(SiMe<sub>3</sub>)<sub>4</sub> (2.43 mmol) and 0.30 g KOtBu (2.67 mmol) and slowly added to a solution of 1.66 g (9.96 mmol) 2,4,6-trimethylbenzoyl fluoride in 15 mL DME at 0°C. The mixture was stirred for another 10 min. For the work up the volatile components were evaporated under reduced pressure. The solid residue was extracted with pentane/toluene and filtered. The filtrate was pumped down. The obtained crude product was recrystallized from toluene, giving orange crystals of **1a**. Yield: 0.86 g (50%) of analytically pure **1a** as orange crystals.

**mp:** 122-125°C. **Anal. Calc.:** C, 67.91; H, 6.27 % **Found:** C, 67.24; H, 5.99 %. **<sup>119</sup>Sn-NMR** (CDCl<sub>3</sub>, TMS, ppm): -499.02. **<sup>13</sup>C-NMR** (CDCl<sub>3</sub>, TMS, ppm): 243.88 (C=O); 143.71, 139.53, 131.95, 128.99 (Mes-C); 21.33, 18.84 (Mes-CH<sub>3</sub>). **<sup>1</sup>H-NMR** (CDCl<sub>3</sub>, TMS, ppm): 6.61 (s, 2H, Mes-H); 2.24 (s, 3H, Mes-CH<sub>3</sub>); 2.05 (s, 6H, Mes-CH<sub>3</sub>). IR (neat):  $\nu(\text{C=O}) = 1662, 1622 \text{ cm}^{-1}$ . **HRMS: Calc.** 561.1458 for (M<sup>+</sup>-Acyl) **Found:** 561.1450. **UV-VIS:**  $\lambda$  [nm] ( $\epsilon$  [L mol<sup>-1</sup> cm<sup>-1</sup>]) = 399 (1727).

## Synthesis of 1b

A solution of (Me<sub>3</sub>Si)<sub>3</sub>SnK in 10 mL of DME was freshly prepared from 1.00 g Sn(SiMe<sub>3</sub>)<sub>4</sub> (2.43 mmol) and 0.30 g KOtBu (2.67 mmol) and slowly added to a solution of 1.52 g (9.96 mmol) 2,6-dimethylbenzoyl fluoride in 15 mL DME at 0°C. The mixture was stirred for another 10 min. For the work up the volatile components were evaporated under reduced pressure. The solid residue was extracted with pentane/toluene and filtered. The filtrate was pumped down. The obtained crude product was recrystallized from toluene, giving orange crystals of **1b**. Yield: 0.98 g (62%) of analytically pure **1b** as orange crystals.

**mp:** 130-135°C. **Anal. Calc.:** C, 66.38; H, 5.57 % **Found:** C, 66.03; H, 5.81 %. **<sup>119</sup>Sn-NMR** (C<sub>6</sub>D<sub>6</sub>, TMS, ppm): -505.88. **<sup>13</sup>C-NMR** (C<sub>6</sub>D<sub>6</sub>, TMS, ppm): 243.18 (C=O); 146.99,

131.88, 129.66, 128.66 (Aryl-C); 18.82 (Aryl-*o*CH<sub>3</sub>). **<sup>1</sup>H-NMR** (C<sub>6</sub>D<sub>6</sub>, TMS, ppm): 7.05 (t, 1H, Aryl-H); 6.84 (s, 2H, Aryl-H); 2.04 (s, 6H, Aryl-*o*CH<sub>3</sub>). IR (neat):  $\nu(\text{C}=\text{O}) = 1669, 1633 \text{ cm}^{-1}$ . **HRMS: Calc.** 519.1027 for (M<sup>+</sup>-Acyl) **Found:** 519.0988 **UV-VIS:**  $\lambda$  [nm] ( $\epsilon$  [L mol<sup>-1</sup> cm<sup>-1</sup>]) = 396 (1758).

## Analytical Section

### NMR-Spectroscopy

**Figure S1:** <sup>1</sup>H-, <sup>13</sup>C- and <sup>119</sup>Sn-NMR spectra of **1a** (CDCl<sub>3</sub> solution, vs. ext. TMS, ppm)

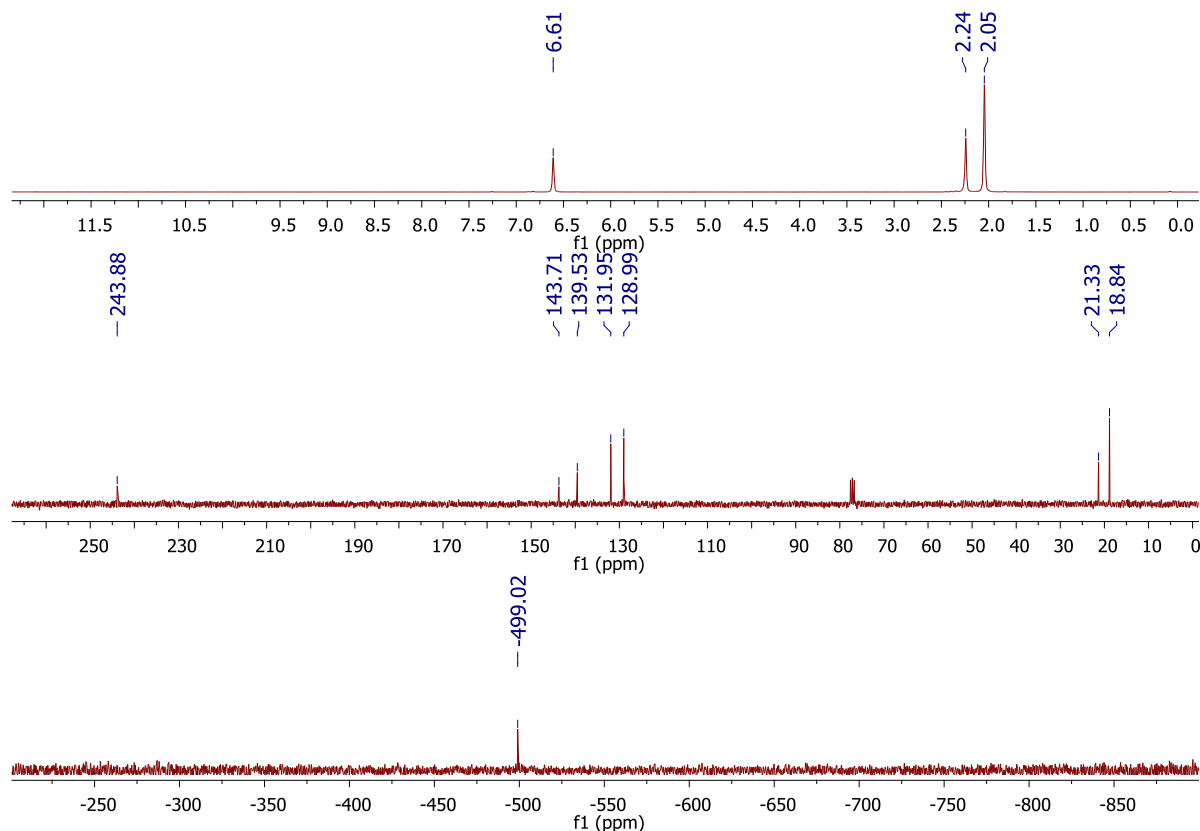

**Figure S2:**  $^1\text{H}$ -,  $^{13}\text{C}$ -,  $^{119}\text{Sn}$  and 2D-HSQC-NMR spectra of **1b** ( $\text{C}_6\text{D}_6$  solution, vs. ext. TMS, ppm)

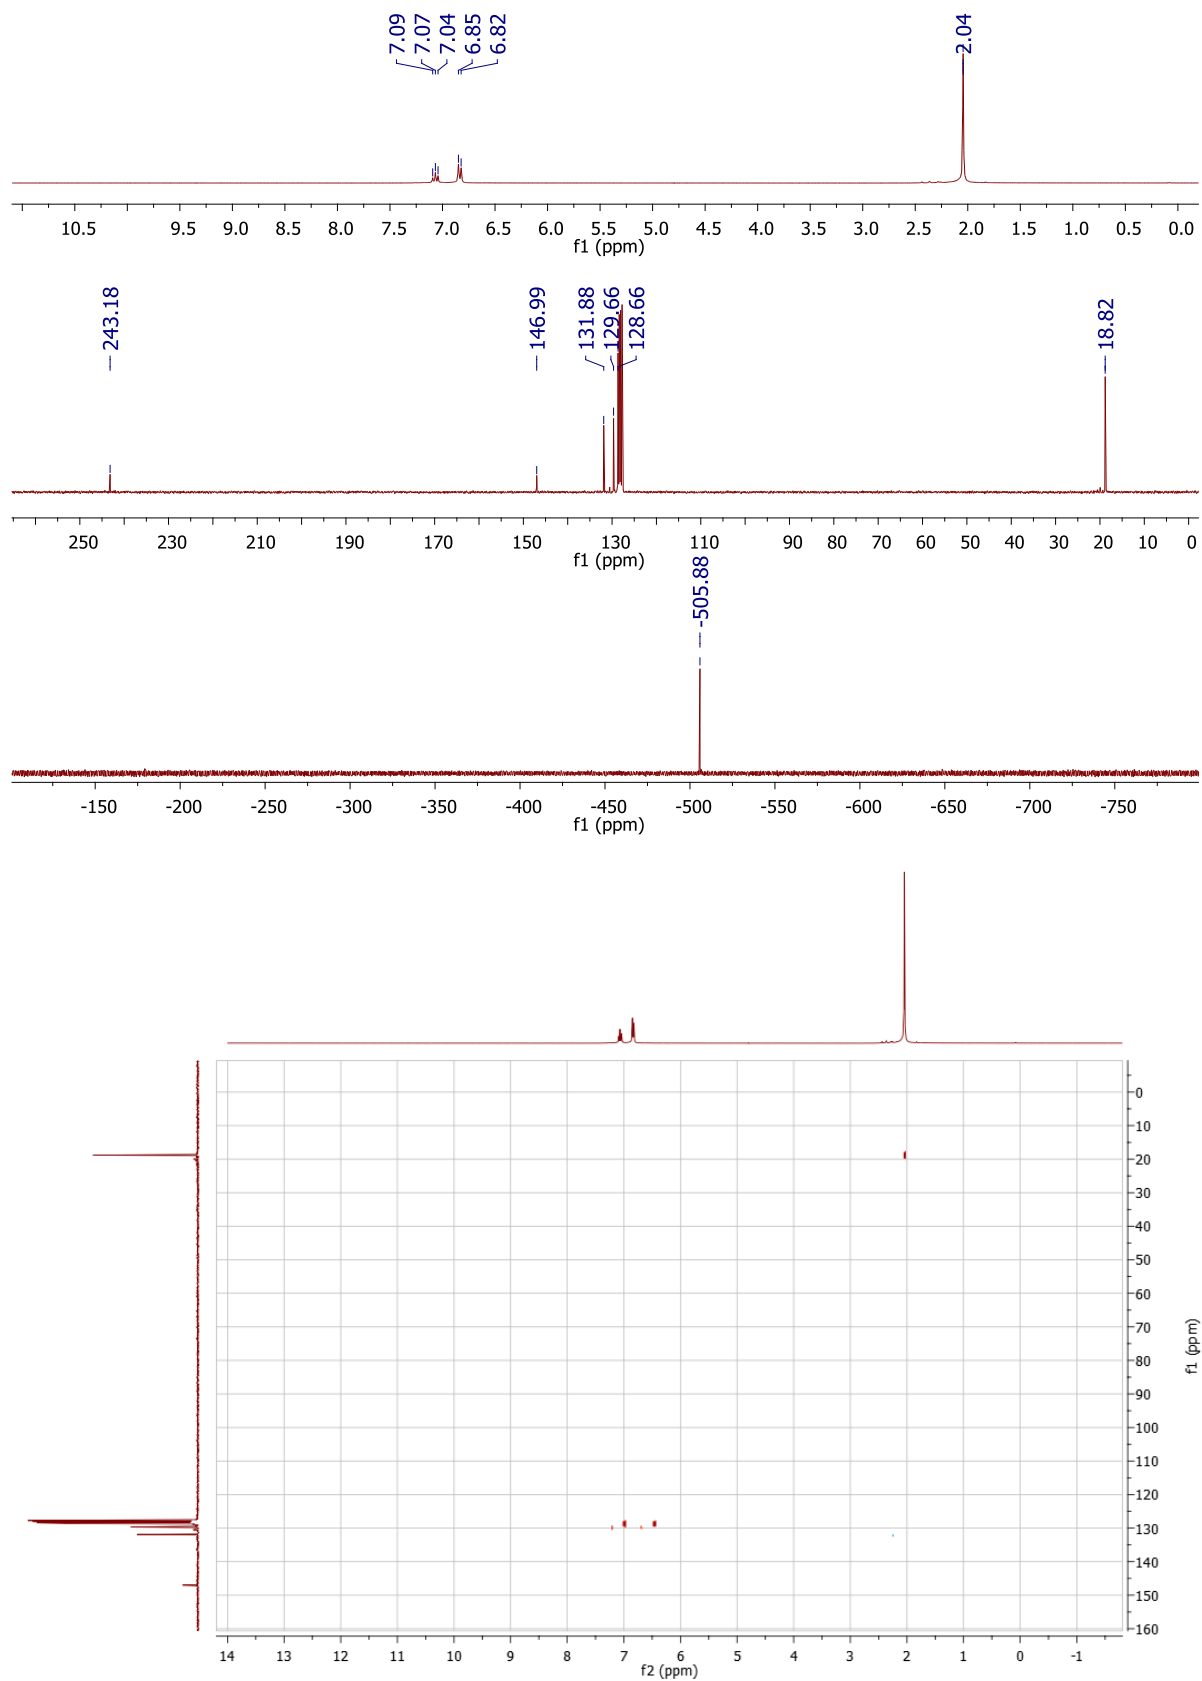

## Steady-State Photolysis (SSP) / UV-Vis Spectroscopy

**Figure S3:** Comparison of the UV-Vis absorption spectra of compounds **1a,b** and **2–5** (samples: 0.6 mM solutions in acetonitrile).

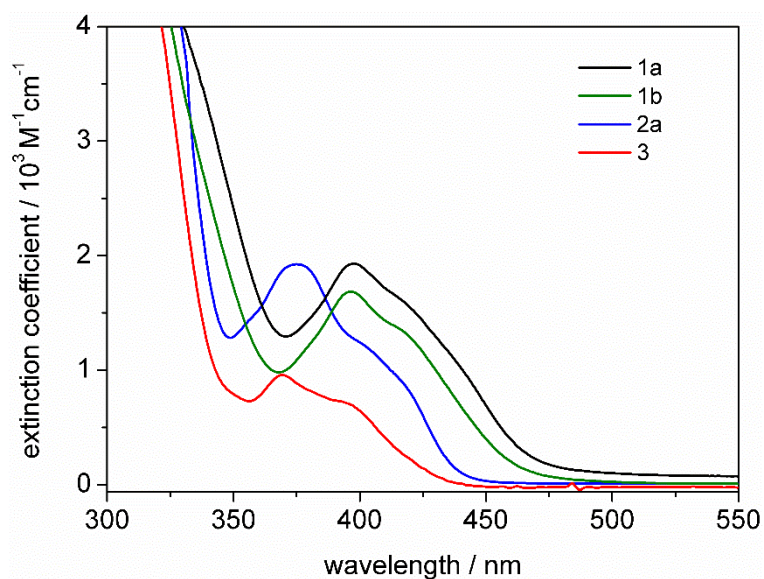

## CIDNP Spectroscopy

**Figure S4:**  $^1\text{H}$  NMR and CIDNP spectra of **1b** (10 mM solution in acetonitrile- $d_3$ ) recorded in presence of butyl acrylate **BA** (50 mM).

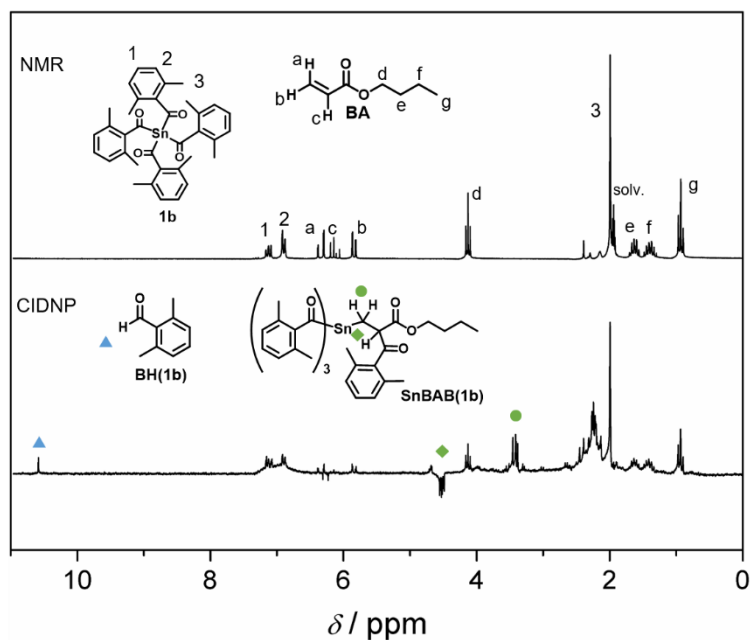

## X-ray Crystallography

All crystals suitable for single crystal X-ray diffractometry were removed from a vial and immediately covered with a layer of silicone oil. A single crystal was selected, mounted on a glass rod on a copper pin, and placed in the cold N<sub>2</sub> stream provided by an Oxford Cryosystems cryostream. XRD data collection was performed for all compounds on a Bruker APEX II diffractometer with use of an Incoatec microfocus sealed tube of Mo K $\alpha$  radiation ( $\lambda = 0.71073 \text{ \AA}$ ) and a CCD area detector. Empirical absorption corrections were applied using SADABS or TWINABS.<sup>[6]</sup> The structures were solved with use of the intrinsic phasing option in SHELXT and refined by the full-matrix least-squares procedures in SHELXL.<sup>[7]</sup> The space group assignments and structural solutions were evaluated using PLATON.<sup>[8]</sup> Non-hydrogen atoms were refined anisotropically. Hydrogen atoms were located in calculated positions corresponding to standard bond lengths and angles. CCDC 1824373 and 1824374 contain the supplementary crystallographic data for all compounds. These data can be obtained free of charge from The Cambridge Crystallographic Data Centre *via* [www.ccdc.cam.ac.uk/data\\_request/cif](http://www.ccdc.cam.ac.uk/data_request/cif). Table S1 contains crystallographic data and details of measurements and refinement for compounds **1a**, **1b**.

**Table S1:** Crystallographic data and details of measurements for compounds **1a**, **1b** Mo K $\alpha$  ( $\lambda = 0.71073 \text{ \AA}$ ).  $R_1 = \sum |F_o| - |F_c| / \sum |F_o|$ ;  $wR_2 = [\sum_w (F_o^2 - F_c^2)^2 / \sum_w (F_o^2)]^{1/2}$

| Compound                                      | <b>1a</b>                                         | <b>1b</b>                                         |
|-----------------------------------------------|---------------------------------------------------|---------------------------------------------------|
| Formula                                       | C <sub>40</sub> H <sub>44</sub> O <sub>4</sub> Sn | C <sub>36</sub> H <sub>36</sub> O <sub>4</sub> Sn |
| Fw (g mol <sup>-1</sup> )                     | 707.44                                            | 651.34                                            |
| <i>a</i> (Å)                                  | 10.8064(4)                                        | 15.062(3)                                         |
| <i>b</i> (Å)                                  | 12.0573(4)                                        | 11.477(2)                                         |
| <i>c</i> (Å)                                  | 14.7267(6)                                        | 17.674(3)                                         |
| $\alpha$ (°)                                  | 112.379(2)                                        | 90                                                |
| $\beta$ (°)                                   | 96.797(2)                                         | 90                                                |
| $\gamma$ (°)                                  | 94.499(2)                                         | 90                                                |
| <i>V</i> (Å <sup>3</sup> )                    | 1745.83(11)                                       | 3055.2(10)                                        |
| <i>Z</i>                                      | 2                                                 | 4                                                 |
| Crystal size (mm)                             | 0.15 × 0.13 × 0.12                                | 0.16 × 0.13 × 0.09                                |
| Crystal habit                                 | Block, yellow                                     | Block, orange                                     |
| Crystal system                                | Triclinic                                         | Orthorhombic                                      |
| Space group                                   | <i>P</i> -1                                       | <i>Pca</i> 2 <sub>1</sub>                         |
| <i>d</i> <sub>calc</sub> (mg/m <sup>3</sup> ) | 1.346                                             | 1.416                                             |
| $\mu$ (mm <sup>-1</sup> )                     | 0.77                                              | 0.87                                              |
| <i>T</i> (K)                                  | 100(2)                                            | 100(2)                                            |
| 2 $\theta$ range (°)                          | 2.6–27.7                                          | 2.3–33.1                                          |
| <i>F</i> (000)                                | 732                                               | 1336                                              |
| <i>R</i> <sub>int</sub>                       | 0.107                                             | 0.084                                             |
| independent reflns                            | 6143                                              | 11687                                             |
| No. of params                                 | 418                                               | 378                                               |
| R1, wR2 (all data)                            | R1 = 0.0337<br>wR2 = 0.0744                       | R1 = 0.0390<br>wR2 = 0.0588                       |
| R1, wR2 (>2 $\sigma$ )                        | R1 = 0.0240<br>wR2 = 0.0516                       | R1 = 0.0297<br>wR2 = 0.0714                       |



## Photo-DSC

**Table S2:** Time to peak maximum  $t_{\max}$ , maximum rate of photopolymerization  $R_{P,\max}$  and final double bond conversion DBC acquired from photo-DSC.

|           | PI<br>[w%] | $t_{\max}$<br>[s] | $R_{P,\max}$<br>[mol L <sup>-1</sup> s <sup>-1</sup> ] | DBC<br>[%] |
|-----------|------------|-------------------|--------------------------------------------------------|------------|
| <b>1a</b> | 0.30       | 4.5               | 0.31                                                   | 59 ± 1     |
| <b>2a</b> | 0.30       | 5.1               | 0.25                                                   | 57 ± 1     |

## Computational Section

All computational studies were executed on a computing cluster with blade architecture using the Gaussian09 software package.<sup>[9]</sup> Geometry optimizations were performed in the gas phase with B3LYP as hybrid density functional<sup>[10]</sup> together with the LANL2DZdp-ECP for Sn<sup>[11]</sup> as well as 6-31+G(d,p) split-valence basis set for H, C and O.<sup>[12]</sup> Minimum structures were characterized by harmonic frequency calculations, yielding none imaginary frequency. Vertical excitations were calculated via time-dependent DFT (TD-DFT) at the LANL2DZdp-ECP(Sn),def2-TZVP(H,C,O) level of theory<sup>[13,14]</sup> and solvent effects were considered by applying the polarized continuum model (PCM).<sup>[15]</sup> Chloroform (CHCl<sub>3</sub>) was used as a solvent with a dielectric constant of  $\epsilon = 4.7113$ . All structures and the simulated UV-Vis spectra were plotted using the Gabedit software package.<sup>[16]</sup>

**Table S3:** Experimental and PCM(CHCl<sub>3</sub>) TD-DFT CAM-B3LYP/LANL2DZdp-ECP(Sn),def2-TZVP(H,C,O)//B3LYP/LANL2DZdp-ECP(Sn),6-31+G(d)(H,C,O) calculated Wavelength Absorption Maxima  $\lambda$  [nm], Extinction Coefficients  $\epsilon$  [dm<sup>2</sup>•mol<sup>-1</sup>] and Oscillator Strengths  $f$  for **1a,b** as well as the corresponding trimethylstannane derivatives.

|           | $\lambda_{\max,\text{exp}}$ ( $\epsilon$ ) | Tetra $\lambda_{\max,\text{calc}}$ (f)       | Mono $\lambda_{\max,\text{calc}}$ (f) | Absorption Edge | Assignment      |
|-----------|--------------------------------------------|----------------------------------------------|---------------------------------------|-----------------|-----------------|
| <b>1a</b> | 398 (1776)                                 | 416, 409, 389<br>(0.0221, 0.0051,<br>0.0137) | 414 (0.0038)                          | 480             | n/σ-π*(CO/Aryl) |
| <b>1b</b> | 396 (1735)                                 | 417, 409, 389<br>(0.0167, 0.0053,<br>0.0131) | 415 (0.0036)                          | 480             | n/σ-π*(CO/Aryl) |

Optimized cartesian coordinates and zero point vibrational energy corrected absolute energy in Hartree of **1a** (calculated with B3LYP/LANL2DZdp-ECP(Sn),6-31+G(d)(H,C,O)).

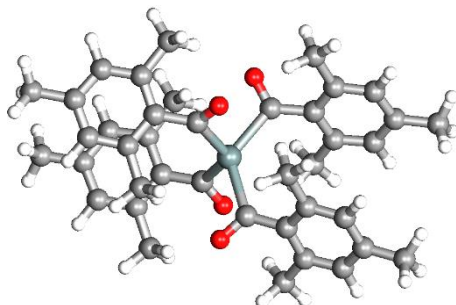

E = -1854.267064 a.u.

|    |           |           |           |   |           |           |           |
|----|-----------|-----------|-----------|---|-----------|-----------|-----------|
| Sn | 0.004788  | 0.000882  | -0.002314 | C | 3.232084  | 0.573082  | -2.011302 |
| C  | 1.048907  | -1.569791 | 1.231538  | C | 3.200694  | 2.825765  | -1.029483 |
| O  | 0.288015  | -2.458006 | 1.587541  | C | 2.530390  | -0.655423 | -2.547238 |
| O  | 0.280764  | 2.460842  | -1.592415 | H | 3.242687  | -1.306293 | -3.063668 |
| C  | 1.043562  | 1.573741  | -1.237921 | H | 1.740345  | -0.398784 | -3.261880 |
| O  | -0.284579 | 2.401092  | 1.678188  | H | 2.060744  | -1.262665 | -1.764239 |
| C  | -1.042735 | 1.527086  | 1.283823  | C | 6.825735  | 1.869820  | -1.815154 |
| O  | -0.284994 | -2.400141 | -1.682300 | H | 7.304461  | 1.392813  | -0.949234 |
| C  | -1.043299 | -1.527262 | -1.285715 | H | 7.181216  | 2.904778  | -1.855145 |
| C  | 3.207094  | -2.819545 | 1.019220  | H | 7.186435  | 1.350453  | -2.709723 |
| C  | 2.525476  | -1.649753 | 1.437345  | C | 2.482051  | 4.024986  | -0.447763 |
| C  | 4.598763  | -2.856536 | 1.144127  | H | 1.744336  | 3.741316  | 0.309876  |
| H  | 5.128930  | -3.743851 | 0.803329  | H | 1.938558  | 4.574098  | -1.223758 |
| C  | 5.326272  | -1.799947 | 1.700310  | H | 3.201584  | 4.709335  | 0.012881  |
| C  | 4.624677  | -0.670237 | 2.131371  | C | -2.521551 | 1.598076  | 1.476877  |
| H  | 5.170484  | 0.155628  | 2.583198  | C | -3.201029 | 2.781327  | 1.096136  |
| C  | 3.237735  | -0.567303 | 2.002069  | C | -4.594721 | 2.809787  | 1.204314  |
| C  | 2.488971  | -4.015598 | 0.430343  | H | -5.122476 | 3.710887  | 0.897906  |
| H  | 3.208932  | -4.697531 | -0.033219 | C | -5.326591 | 1.728502  | 1.703439  |
| H  | 1.751500  | -3.728439 | -0.326217 | C | -4.625976 | 0.588444  | 2.109450  |
| H  | 1.945231  | -4.568746 | 1.203311  | H | -5.173828 | -0.252193 | 2.530558  |
| C  | 2.537351  | 0.664647  | 2.531549  | C | -3.237612 | 0.494427  | 1.994707  |
| H  | 1.745941  | 0.412189  | 3.246112  | C | -2.478345 | 4.003518  | 0.569944  |
| H  | 2.069864  | 1.269303  | 1.745277  | H | -1.941404 | 4.520410  | 1.372124  |
| H  | 3.249879  | 1.316517  | 3.046406  | H | -3.194278 | 4.705979  | 0.131529  |
| C  | 6.825053  | -1.892432 | 1.864204  | H | -1.734470 | 3.750422  | -0.192446 |
| H  | 7.090109  | -2.349427 | 2.827305  | C | -6.833676 | 1.782712  | 1.788527  |
| H  | 7.294138  | -0.903074 | 1.835238  | H | -7.206851 | 1.227535  | 2.656059  |
| H  | 7.277118  | -2.507743 | 1.078931  | H | -7.295765 | 1.338359  | 0.896396  |
| C  | 2.519833  | 1.654659  | -1.443841 | H | -7.195002 | 2.813773  | 1.862580  |

|   |           |           |           |
|---|-----------|-----------|-----------|
| C | -2.538569 | -0.749871 | 2.496419  |
| H | -1.755555 | -0.515551 | 3.226250  |
| H | -2.061280 | -1.329957 | 1.697682  |
| H | -3.254387 | -1.418603 | 2.984356  |
| C | -2.522547 | -1.600304 | -1.474645 |
| C | -3.241426 | -0.497753 | -1.990907 |
| C | -4.629992 | -0.593519 | -2.101605 |
| H | -5.180085 | 0.246245  | -2.521534 |
| C | -5.328040 | -1.734250 | -1.693052 |
| C | -4.593417 | -2.814448 | -1.195635 |
| H | -5.119195 | -3.716066 | -0.887352 |
| C | -3.199446 | -2.784239 | -1.091501 |
| C | -2.545337 | 0.747176  | -2.495211 |
| H | -2.067291 | 1.328786  | -1.698022 |
| H | -3.263232 | 1.414337  | -2.982251 |
| H | -1.763505 | 0.513427  | -3.226478 |
| C | -6.835306 | -1.790275 | -1.773652 |
| H | -7.195634 | -2.821792 | -1.846180 |
| H | -7.211717 | -1.235899 | -2.640298 |
| H | -7.295251 | -1.346069 | -0.880334 |
| C | -2.473703 | -4.005343 | -0.567011 |
| H | -1.727463 | -3.751020 | 0.192639  |
| H | -1.939038 | -4.522224 | -1.370735 |
| H | -3.187387 | -4.708277 | -0.125684 |
| C | 4.592445  | 2.863998  | -1.157304 |
| H | 5.121533  | 3.755345  | -0.825647 |
| C | 5.320569  | 1.805184  | -1.707403 |
| C | 4.618176  | 0.677340  | -2.143533 |
| H | 5.162901  | -0.144807 | -2.603324 |

Optimized cartesian coordinates and zero point vibrational energy corrected absolute energy in Hartree of **1b** (calculated with B3LYP/LANL2DZdp-ECP(Sn),6-31+G(d)(H,C,O)).

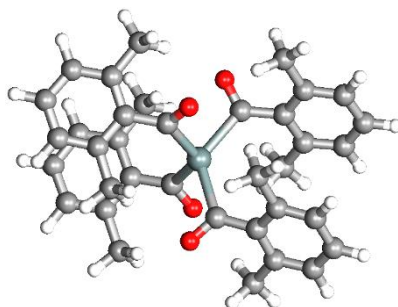

E = -1697.105806 a.u.

|    |           |           |           |   |           |           |           |
|----|-----------|-----------|-----------|---|-----------|-----------|-----------|
| C  | 4.633268  | 0.630465  | -2.100668 | H | 6.393759  | -1.810497 | 1.721691  |
| C  | 3.242043  | 0.537775  | -1.998287 | C | 2.536890  | 0.683916  | 2.545037  |
| C  | 2.530703  | 1.624968  | -1.440875 | C | -1.048651 | 1.547858  | 1.260731  |
| C  | 3.203360  | 2.793537  | -1.004892 | C | -2.530744 | 1.624636  | 1.441060  |
| C  | 4.598821  | 2.827337  | -1.103243 | C | -3.203737 | 2.793146  | 1.005422  |
| C  | 5.310760  | 1.759479  | -1.645551 | C | -4.599181 | 2.826658  | 1.104106  |
| C  | 1.048573  | 1.547896  | -1.260874 | C | -5.310785 | 1.758559  | 1.646378  |
| O  | 0.291534  | 2.421334  | -1.656143 | C | -4.632969 | 0.629578  | 2.101100  |
| C  | 2.537050  | -0.683479 | -2.545830 | C | -3.241748 | 0.537184  | 1.998393  |
| C  | 2.471827  | 3.989680  | -0.433112 | C | -2.472632 | 3.989538  | 0.433589  |
| H  | 6.393853  | 1.810518  | -1.720579 | H | -6.393870 | 1.809361  | 1.721671  |
| Sn | 0.000013  | 0.000171  | -0.000027 | C | -2.536418 | -0.684117 | 2.545401  |
| C  | -1.048525 | -1.547579 | -1.260895 | O | 0.291583  | -2.421614 | 1.655066  |
| C  | -2.530631 | -1.624689 | -1.441012 | O | -0.291754 | 2.421576  | 1.655670  |
| C  | -3.242004 | -0.537353 | -1.998114 | O | -0.291421 | -2.420931 | -1.656233 |
| C  | -4.633228 | -0.630038 | -2.100549 | H | 5.129285  | -3.711291 | 0.758066  |
| C  | -5.310699 | -1.759213 | -1.645801 | H | 5.185892  | 0.193944  | 2.544421  |
| C  | -4.598734 | -2.827225 | -1.103826 | H | 3.182640  | -4.676385 | -0.037880 |
| C  | -3.203279 | -2.793417 | -1.005424 | H | 1.724816  | -3.704351 | -0.314035 |
| C  | -2.537085 | 0.684117  | -2.545288 | H | 1.938899  | -4.538044 | 1.217272  |
| H  | -6.393789 | -1.810257 | -1.720858 | H | 1.759747  | 0.419407  | 3.270953  |
| C  | -2.471783 | -3.989707 | -0.433892 | H | 2.050913  | 1.287689  | 1.769155  |
| C  | 1.048613  | -1.547918 | 1.260325  | H | 3.250628  | 1.340539  | 3.052048  |
| C  | 2.530663  | -1.624912 | 1.440711  | H | 3.250867  | -1.340151 | -3.052666 |
| C  | 3.203447  | -2.793628 | 1.005294  | H | 1.760285  | -0.418651 | -3.272032 |
| C  | 4.598882  | -2.827452 | 1.104114  | H | 2.050574  | -1.287276 | -1.770268 |
| C  | 5.310691  | -1.759461 | 1.646305  | H | 1.724730  | 3.703975  | 0.314657  |
| C  | 4.633089  | -0.630270 | 2.100840  | H | 1.938107  | 4.537403  | -1.216899 |
| C  | 3.241904  | -0.537570 | 1.998012  | H | 3.182103  | 4.676512  | 0.037920  |
| C  | 2.472202  | -3.989934 | 0.433464  | H | -5.129781 | 3.710321  | 0.757907  |

|   |           |           |           |
|---|-----------|-----------|-----------|
| H | -5.185614 | -0.194711 | 2.544745  |
| H | -1.939078 | 4.537478  | 1.217333  |
| H | -3.183177 | 4.676099  | -0.037432 |
| H | -1.725464 | 3.704078  | -0.314201 |
| H | -1.759238 | -0.419413 | 3.271203  |
| H | -2.050413 | -1.287815 | 1.769468  |
| H | -3.249936 | -1.340872 | 3.052550  |
| H | -5.186139 | 0.194177  | -2.543998 |
| H | -5.129064 | -3.711056 | -0.757643 |
| H | -2.051217 | 1.288034  | -1.769444 |
| H | -3.250852 | 1.340596  | -3.052443 |
| H | -1.759869 | 0.419588  | -3.271111 |
| H | -1.724671 | -3.704146 | 0.313911  |
| H | -1.938094 | -4.537304 | -1.217786 |
| H | -3.182088 | -4.676590 | 0.037016  |
| H | 5.129170  | 3.711042  | -0.756767 |
| H | 5.186175  | -0.193611 | -2.544384 |

Optimized cartesian coordinates and zero point vibrational energy corrected absolute energy in Hartree of mesityltrimethylstannane (calculated with B3LYP/LANL2DZdp-ECP(Sn),6-31+G(d)(H,C,O)).

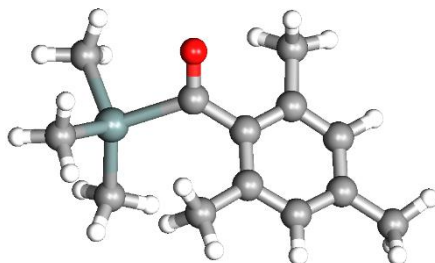

E = -585.731313 a.u.

|    |           |           |           |   |          |           |           |
|----|-----------|-----------|-----------|---|----------|-----------|-----------|
| C  | 1.329949  | -3.539780 | 0.741244  | H | 3.119691 | -7.463400 | 0.558283  |
| C  | 1.124650  | -3.231738 | -0.623331 | H | 4.500298 | -6.696401 | -0.231135 |
| C  | 1.796659  | -3.977328 | -1.624560 | H | 2.093584 | -4.487621 | -3.694997 |
| C  | 2.615289  | -5.040823 | -1.232591 | H | 0.621029 | -3.541385 | -3.408505 |
| C  | 2.824069  | -5.367253 | 0.110280  | H | 2.179612 | -2.745206 | -3.363288 |
| C  | 2.185996  | -4.590075 | 1.081230  |   |          |           |           |
| C  | 0.182495  | -2.137352 | -1.030248 |   |          |           |           |
| O  | 0.474243  | -1.344151 | -1.920408 |   |          |           |           |
| C  | 1.663699  | -3.673985 | -3.102023 |   |          |           |           |
| C  | 3.701288  | -6.533366 | 0.500003  |   |          |           |           |
| C  | 0.700580  | -2.729184 | 1.856486  |   |          |           |           |
| Sn | -1.927876 | -1.878463 | -0.353924 |   |          |           |           |
| C  | -2.050191 | -0.083159 | 0.830698  |   |          |           |           |
| C  | -2.960199 | -1.588504 | -2.218177 |   |          |           |           |
| C  | -2.783316 | -3.558523 | 0.706400  |   |          |           |           |
| H  | -3.093918 | 0.228724  | 0.945122  |   |          |           |           |
| H  | -1.625318 | -0.235527 | 1.828026  |   |          |           |           |
| H  | -1.501313 | 0.726837  | 0.339677  |   |          |           |           |
| H  | -3.806132 | -3.737347 | 0.357691  |   |          |           |           |
| H  | -2.198850 | -4.467505 | 0.530032  |   |          |           |           |
| H  | -2.817847 | -3.374382 | 1.785117  |   |          |           |           |
| H  | -3.922547 | -1.089140 | -2.062934 |   |          |           |           |
| H  | -2.343703 | -0.968623 | -2.876092 |   |          |           |           |
| H  | -3.145589 | -2.545919 | -2.716480 |   |          |           |           |
| H  | 3.116210  | -5.624428 | -2.002710 |   |          |           |           |
| H  | 2.362333  | -4.804204 | 2.133709  |   |          |           |           |
| H  | -0.370039 | -2.941987 | 1.968452  |   |          |           |           |
| H  | 1.172464  | -2.971001 | 2.814125  |   |          |           |           |
| H  | 0.809147  | -1.650875 | 1.699495  |   |          |           |           |
| H  | 4.163244  | -6.377796 | 1.480761  |   |          |           |           |

Optimized cartesian coordinates and zero point vibrational energy corrected absolute energy in Hartree of 2,6-dimethylbenzoyltrimethylstannane (calculated with B3LYP/LANL2DZdp-ECP(Sn),6-31+G(d)(H,C,O)).

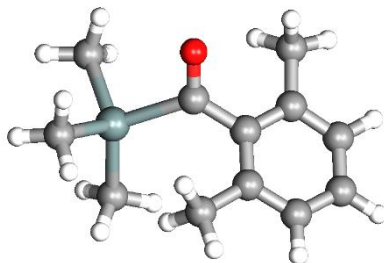

E = -546.441003 a.u.

|    |           |           |           |   |          |           |           |
|----|-----------|-----------|-----------|---|----------|-----------|-----------|
| C  | 1.374843  | -3.487835 | 0.780919  | H | 0.610713 | -3.534042 | -3.360642 |
| C  | 1.164042  | -3.197027 | -0.586454 | H | 2.165616 | -2.726954 | -3.341314 |
| C  | 1.815430  | -3.953829 | -1.591862 |   |          |           |           |
| C  | 2.632685  | -5.020730 | -1.200450 |   |          |           |           |
| C  | 2.839985  | -5.316350 | 0.144748  |   |          |           |           |
| C  | 2.225013  | -4.542989 | 1.126653  |   |          |           |           |
| C  | 0.220214  | -2.100292 | -0.994378 |   |          |           |           |
| O  | 0.532087  | -1.278699 | -1.849771 |   |          |           |           |
| C  | 1.658951  | -3.657501 | -3.068493 |   |          |           |           |
| H  | 3.487144  | -6.142438 | 0.427670  |   |          |           |           |
| C  | 0.754288  | -2.656910 | 1.885770  |   |          |           |           |
| Sn | -1.910607 | -1.899591 | -0.364452 |   |          |           |           |
| C  | -2.098198 | -0.103127 | 0.809349  |   |          |           |           |
| C  | -2.913046 | -1.644378 | -2.250362 |   |          |           |           |
| C  | -2.729451 | -3.599178 | 0.690893  |   |          |           |           |
| H  | -3.152426 | 0.170295  | 0.925470  |   |          |           |           |
| H  | -1.664485 | -0.233886 | 1.805952  |   |          |           |           |
| H  | -1.581005 | 0.723610  | 0.311934  |   |          |           |           |
| H  | -3.759060 | -3.780203 | 0.364123  |   |          |           |           |
| H  | -2.142825 | -4.501152 | 0.488150  |   |          |           |           |
| H  | -2.739088 | -3.430501 | 1.772646  |   |          |           |           |
| H  | -3.900699 | -1.191034 | -2.114454 |   |          |           |           |
| H  | -2.311657 | -0.991397 | -2.890187 |   |          |           |           |
| H  | -3.042174 | -2.605551 | -2.758950 |   |          |           |           |
| H  | 3.120792  | -5.618904 | -1.966129 |   |          |           |           |
| H  | 2.406872  | -4.754789 | 2.177635  |   |          |           |           |
| H  | -0.320379 | -2.850130 | 1.996740  |   |          |           |           |
| H  | 1.219293  | -2.895942 | 2.847453  |   |          |           |           |
| H  | 0.880790  | -1.582088 | 1.717481  |   |          |           |           |
| H  | 2.084698  | -4.470825 | -3.664675 |   |          |           |           |

## Simulation of UV-Vis spectra

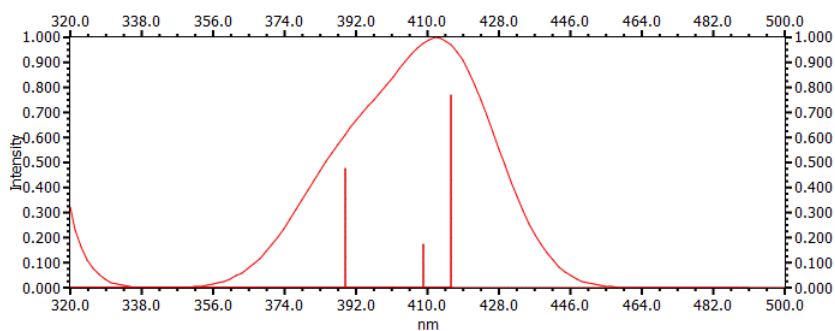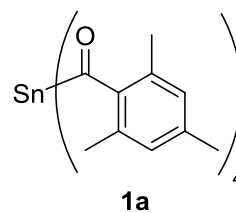

**Figure S5:** Simulated UV-Vis spectrum of **1a** at the PCM(CHCl<sub>3</sub>) TD-DFT CAM-B3LYP/LANL2DZdp-ECP(Sn),def2-TZVP(H,C,O)//B3LYP/LANL2DZdp-ECP(Sn),6-31+G(d)(H,C,O) level of theory.

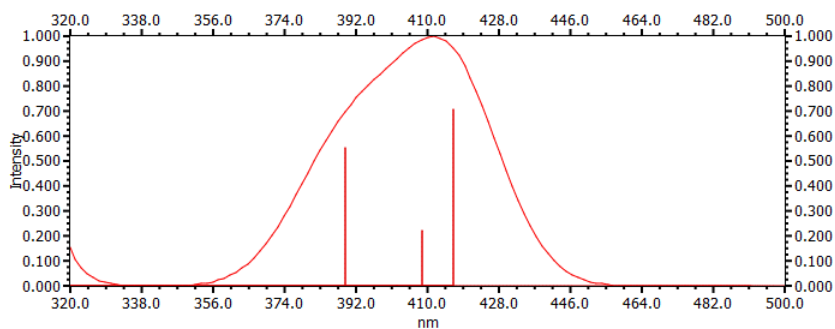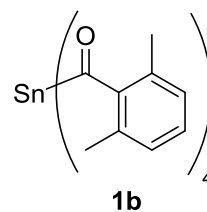

**Figure S6:** Simulated UV-Vis spectrum of **1b** at the PCM(CHCl<sub>3</sub>) TD-DFT CAM-B3LYP/LANL2DZdp-ECP(Sn),def2-TZVP(H,C,O)//B3LYP/LANL2DZdp-ECP(Sn),6-31+G(d)(H,C,O) level of theory.

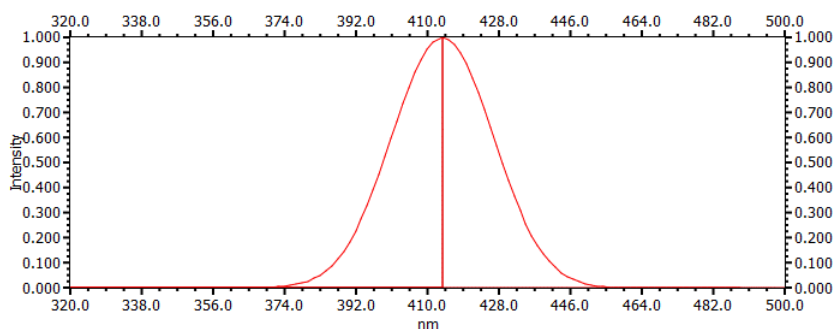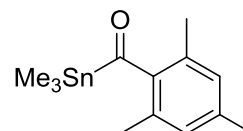

**Figure S7:** Simulated UV-Vis spectrum of mesityltrimethylstannane at the PCM(CHCl<sub>3</sub>) TD-DFT CAM-B3LYP/LANL2DZdp-ECP(Sn),def2-TZVP(H,C,O)//B3LYP/LANL2DZdp-ECP(Sn),6-31+G(d)(H,C,O) level of theory.



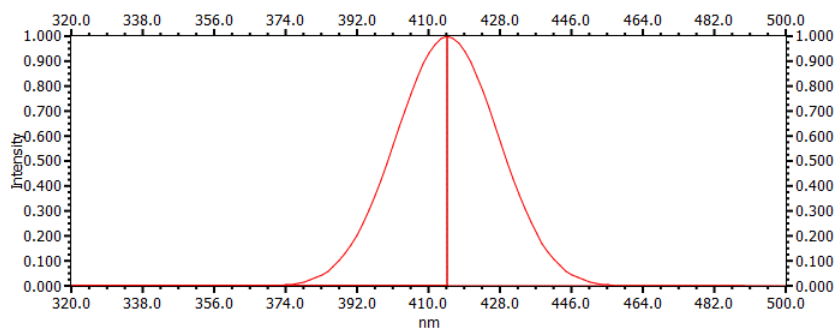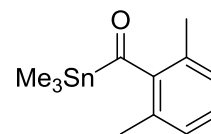

**Figure S8:** Simulated UV-Vis spectrum of 2,6-dimethylbenzoyltrimethylstannane at the PCM(CHCl<sub>3</sub>) TD-DFT CAM-B3LYP/LANL2DZdp-ECP(Sn),def2-TZVP(H,C,O)//B3LYP/LANL2DZdp-ECP(Sn),6-31+G(d)(H,C,O) level of theory.

Calculated UV-Vis spectrum of **1a** for the first ten singlet excitations at the PCM(CHCl<sub>3</sub>) TD-DFT CAM-B3LYP/LANL2DZdp-ECP(Sn),def2-TZVP(H,C,O)//B3LYP/LANL2DZdp-ECP(Sn),6-31+G(d)(H,C,O) level of theory.

Excited State 1: Singlet-A 2.9792 eV 416.17 nm f=0.0221 <S\*\*2>=0.000  
149 -> 163 0.15217  
150 -> 162 -0.15891  
158 -> 164 -0.30266  
159 -> 162 0.28674  
160 -> 161 0.46652

This state for optimization and/or second-order correction.

Total Energy, E(TD-HF/TD-KS) = -1854.57798038

Copying the excited state density for this state as the 1-particle RhoCI density.

Excited State 2: Singlet-A 3.0304 eV 409.14 nm f=0.0051 <S\*\*2>=0.000  
149 -> 164 -0.16043  
150 -> 161 -0.17832  
158 -> 163 0.31363  
159 -> 161 0.34640  
160 -> 162 0.40471

Excited State 3: Singlet-A 3.0884 eV 401.45 nm f=0.0000 <S\*\*2>=0.000  
149 -> 162 0.17046  
150 -> 163 -0.15826  
152 -> 161 -0.11829  
158 -> 161 0.42035  
159 -> 163 0.26820  
160 -> 164 -0.35889

Excited State 4: Singlet-A 3.1849 eV 389.29 nm f=0.0137 <S\*\*2>=0.000  
149 -> 161 0.17940  
150 -> 164 0.17941  
152 -> 162 -0.12075  
158 -> 162 0.37024  
159 -> 164 -0.27753  
160 -> 163 0.37282

Excited State 5: Singlet-A 4.3130 eV 287.47 nm f=0.0836 <S\*\*2>=0.000  
151 -> 164 0.16330  
152 -> 163 0.11688  
155 -> 162 0.21939  
157 -> 163 -0.12108  
159 -> 161 0.50162  
160 -> 162 -0.27106  
160 -> 165 0.13418

Excited State 6: Singlet-A 4.3590 eV 284.43 nm f=0.2560 <S\*\*2>=0.000  
150 -> 162 0.20724  
152 -> 164 -0.13000  
158 -> 164 0.25117  
158 -> 166 0.10052

159 -> 162 -0.27018  
160 -> 161 0.49577

Excited State 7: Singlet-A 4.4640 eV 277.74 nm f=0.0006 <S\*\*2>=0.000

155 -> 164 -0.10389  
158 -> 161 0.49196  
160 -> 164 0.43354  
160 -> 166 0.13594

Excited State 8: Singlet-A 4.5246 eV 274.03 nm f=0.0362 <S\*\*2>=0.000

150 -> 164 0.18470  
151 -> 161 0.31155  
152 -> 162 -0.16223  
154 -> 161 0.13180  
155 -> 163 -0.29058  
157 -> 162 0.21814  
158 -> 162 -0.24529  
159 -> 164 0.26050  
160 -> 163 0.10070

Excited State 9: Singlet-A 4.5421 eV 272.97 nm f=0.7916 <S\*\*2>=0.000

150 -> 162 0.19718  
151 -> 163 -0.22590  
152 -> 164 -0.12836  
154 -> 163 -0.13978  
155 -> 161 0.36482  
157 -> 164 0.22230  
159 -> 162 0.37424

Excited State 10: Singlet-A 4.5573 eV 272.06 nm f=0.0405 <S\*\*2>=0.000

150 -> 161 0.31028  
151 -> 164 0.14626  
152 -> 163 0.14332  
154 -> 164 0.11005  
155 -> 162 0.19308  
157 -> 163 -0.23895  
158 -> 163 -0.17776  
160 -> 162 0.42776

Calculated UV-Vis spectrum of **1b** for the first ten singlet excitations at the PCM(CHCl<sub>3</sub>) TD-DFT CAM-B3LYP/LANL2DZdp-ECP(Sn),def2-TZVP(H,C,O)//B3LYP/LANL2DZdp-ECP(Sn),6-31+G(d)(H,C,O) level of theory.

Excited State 1: Singlet-A 2.9766 eV 416.53 nm f=0.0167 <S\*\*2>=0.000  
133 -> 147 -0.15218  
135 -> 146 -0.12699  
142 -> 146 0.29847  
143 -> 148 0.31282  
144 -> 145 0.47070

This state for optimization and/or second-order correction.

Total Energy, E(TD-HF/TD-KS) = -1697.35035259

Copying the excited state density for this state as the 1-particle RhoCI density.

Excited State 2: Singlet-A 3.0328 eV 408.82 nm f=0.0053 <S\*\*2>=0.000  
133 -> 148 -0.16107  
135 -> 145 -0.14257  
142 -> 145 0.36486  
143 -> 147 0.32389  
144 -> 146 0.40248

Excited State 3: Singlet-A 3.0810 eV 402.42 nm f=0.0000 <S\*\*2>=0.000  
133 -> 146 -0.16876  
135 -> 147 -0.12776  
136 -> 145 -0.10331  
142 -> 147 0.28157  
143 -> 145 0.43432  
144 -> 148 0.36056

Excited State 4: Singlet-A 3.1848 eV 389.30 nm f=0.0131 <S\*\*2>=0.000  
133 -> 145 -0.17950  
135 -> 148 -0.14776  
136 -> 146 -0.10923  
142 -> 148 0.29714  
143 -> 146 0.38102  
144 -> 147 0.37560

Excited State 5: Singlet-A 4.3729 eV 283.53 nm f=0.0714 <S\*\*2>=0.000  
134 -> 148 0.13109  
136 -> 147 0.11484  
137 -> 146 -0.18412  
142 -> 145 0.49475  
144 -> 146 -0.34515  
144 -> 149 0.15374

Excited State 6: Singlet-A 4.3743 eV 283.44 nm f=0.1489 <S\*\*2>=0.000  
135 -> 146 0.15387  
136 -> 148 0.11294  
142 -> 146 -0.30348  
142 -> 149 0.10591  
143 -> 148 -0.27628

143 -> 150 -0.10477  
144 -> 145 0.48903

Excited State 7: Singlet-A 4.4637 eV 277.76 nm f=0.0000 <S\*\*2>=0.000

143 -> 145 0.48961  
144 -> 148 -0.44677  
144 -> 150 -0.14172

Excited State 8: Singlet-A 4.6144 eV 268.69 nm f=0.1089 <S\*\*2>=0.000

134 -> 148 0.14167  
135 -> 145 0.24794  
136 -> 147 0.15902  
137 -> 146 -0.18341  
138 -> 145 0.24196  
139 -> 148 0.17689  
140 -> 146 -0.18940  
141 -> 147 -0.25376  
143 -> 147 -0.17691  
144 -> 146 0.30591

Excited State 9: Singlet-A 4.6183 eV 268.46 nm f=0.0083 <S\*\*2>=0.000

134 -> 145 -0.21871  
135 -> 148 -0.11670  
136 -> 146 -0.13431  
137 -> 147 0.22455  
142 -> 148 -0.22998  
143 -> 146 -0.36516  
144 -> 147 0.37499

Excited State 10: Singlet-A 4.6320 eV 267.67 nm f=0.0004 <S\*\*2>=0.000

137 -> 147 -0.10259  
138 -> 148 0.21003  
139 -> 145 0.34949  
140 -> 147 -0.25308  
141 -> 146 -0.31303  
143 -> 146 -0.14155  
144 -> 147 0.21866

Calculated UV-Vis spectrum of mesityltrimethylstannane for the first ten singlet excitations at the PCM(CHCl<sub>3</sub>) TD-DFT CAM-B3LYP/LANL2DZdp-ECP(Sn),def2-TZVP(H,C,O)//B3LYP/LANL2DZdp-ECP(Sn),6-31+G(d)(H,C,O) level of theory.

Excited State 1: Singlet-A 2.9951 eV 413.96 nm f=0.0038 <S\*\*2>=0.000  
54 -> 56 -0.15006  
55 -> 56 0.64122  
55 -> 61 -0.17376

This state for optimization and/or second-order correction.

Total Energy, E(TD-HF/TD-KS) = -585.797317134

Copying the excited state density for this state as the 1-particle RhoCl density.

Excited State 2: Singlet-A 4.7124 eV 263.10 nm f=0.1648 <S\*\*2>=0.000  
53 -> 56 0.17342  
53 -> 60 0.13455  
54 -> 56 0.61418  
54 -> 60 -0.11129  
55 -> 56 0.13783

Excited State 3: Singlet-A 4.7892 eV 258.88 nm f=0.1621 <S\*\*2>=0.000  
53 -> 56 0.61130  
54 -> 56 -0.19031  
54 -> 60 -0.15503  
55 -> 56 -0.14859

Excited State 4: Singlet-A 5.6502 eV 219.43 nm f=0.0698 <S\*\*2>=0.000  
53 -> 56 0.14752  
55 -> 56 0.10758  
55 -> 57 -0.16175  
55 -> 59 -0.14359  
55 -> 60 0.49151  
55 -> 61 0.37647

Excited State 5: Singlet-A 5.7374 eV 216.10 nm f=0.0456 <S\*\*2>=0.000  
54 -> 56 -0.15284  
55 -> 56 0.11682  
55 -> 57 -0.15724  
55 -> 58 -0.16289  
55 -> 59 0.25628  
55 -> 60 -0.30845  
55 -> 61 0.44823

Excited State 6: Singlet-A 5.9872 eV 207.08 nm f=0.1050 <S\*\*2>=0.000  
53 -> 56 0.21339  
53 -> 59 0.12837  
53 -> 60 -0.29527  
53 -> 61 -0.15637  
54 -> 56 0.11005  
54 -> 58 0.11393  
54 -> 59 -0.20940  
54 -> 60 0.40588

54 -> 61 -0.15607  
55 -> 60 -0.14955

Excited State 7: Singlet-A 6.1258 eV 202.40 nm f=0.1924 <S\*\*2>=0.000

53 -> 58 0.11598  
53 -> 59 -0.21005  
53 -> 60 0.40823  
53 -> 61 -0.15313  
54 -> 59 -0.14525  
54 -> 60 0.32739  
54 -> 61 0.24401

Excited State 8: Singlet-A 6.1886 eV 200.34 nm f=0.0713 <S\*\*2>=0.000

52 -> 56 0.65575  
52 -> 61 -0.14262

Excited State 9: Singlet-A 6.2582 eV 198.11 nm f=0.0201 <S\*\*2>=0.000

52 -> 56 0.10169  
55 -> 57 0.50369  
55 -> 58 -0.16136  
55 -> 59 0.31756  
55 -> 60 0.21176  
55 -> 68 0.11160

Excited State 10: Singlet-A 6.3440 eV 195.44 nm f=0.0148 <S\*\*2>=0.000

51 -> 56 0.64603  
51 -> 61 -0.11985  
55 -> 57 0.14873

Calculated UV-Vis spectrum of 2,6-dimethylbenzoyltrimethylstannane for the first ten singlet excitations at the PCM(CHCl<sub>3</sub>) TD-DFT CAM-B3LYP/LANL2DZdp-ECP(Sn),def2-TZVP(H,C,O)//B3LYP/LANL2DZdp-ECP(Sn),6-31+G(d)(H,C,O) level of theory.

Excited State 1: Singlet-A 2.9884 eV 414.88 nm f=0.0036 <S\*\*2>=0.000  
49 -> 52 -0.13153  
51 -> 52 0.64927  
51 -> 57 -0.18551

This state for optimization and/or second-order correction.

Total Energy, E(TD-HF/TD-KS) = -546.490896916

Copying the excited state density for this state as the 1-particle RhoCl density.

Excited State 2: Singlet-A 4.7633 eV 260.29 nm f=0.0608 <S\*\*2>=0.000  
49 -> 52 -0.12531  
49 -> 56 0.20281  
50 -> 52 0.63076

Excited State 3: Singlet-A 4.9058 eV 252.73 nm f=0.1922 <S\*\*2>=0.000  
49 -> 52 0.64284  
50 -> 52 0.12090  
51 -> 52 0.15942

Excited State 4: Singlet-A 5.5850 eV 222.00 nm f=0.0424 <S\*\*2>=0.000  
49 -> 52 -0.10924  
51 -> 52 0.16185  
51 -> 53 -0.18395  
51 -> 56 0.35001  
51 -> 57 0.52139

Excited State 5: Singlet-A 5.7539 eV 215.48 nm f=0.0393 <S\*\*2>=0.000  
50 -> 52 -0.15106  
51 -> 53 0.12301  
51 -> 54 0.10718  
51 -> 55 -0.32357  
51 -> 56 0.48685  
51 -> 57 -0.28132

Excited State 6: Singlet-A 6.0868 eV 203.69 nm f=0.0865 <S\*\*2>=0.000  
48 -> 52 0.10437  
49 -> 55 -0.23532  
49 -> 56 0.45345  
50 -> 52 -0.23385  
50 -> 56 0.12255  
50 -> 57 0.30716  
51 -> 56 -0.11044

Excited State 7: Singlet-A 6.1749 eV 200.79 nm f=0.0967 <S\*\*2>=0.000  
47 -> 52 -0.14103  
48 -> 52 0.30893



49 -> 56 -0.14266  
49 -> 57 -0.23227  
50 -> 55 -0.24184  
50 -> 56 0.44504

Excited State 8: Singlet-A 6.1839 eV 200.50 nm f=0.1793 <S\*\*2>=0.000

48 -> 52 0.57429  
48 -> 57 -0.13199  
49 -> 57 0.12179  
50 -> 55 0.14472  
50 -> 56 -0.28463

Excited State 9: Singlet-A 6.3043 eV 196.67 nm f=0.0194 <S\*\*2>=0.000

47 -> 52 -0.30625  
51 -> 53 0.39256  
51 -> 54 -0.17981  
51 -> 55 0.36425  
51 -> 56 0.19118  
51 -> 63 0.10982

Excited State 10: Singlet-A 6.3263 eV 195.98 nm f=0.0196 <S\*\*2>=0.000

47 -> 52 0.58341  
47 -> 57 -0.11813  
48 -> 52 0.15416  
51 -> 53 0.26380  
51 -> 55 0.13952

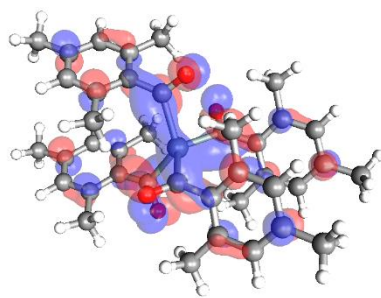

-0.62 eV

**LUMO+1**

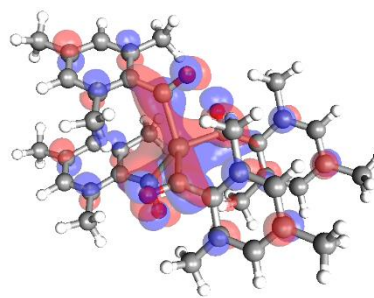

-0.91 eV

**LUMO**

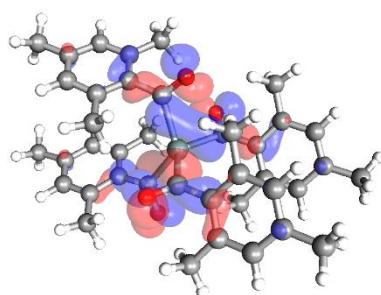

-7.46 eV

**HOMO**

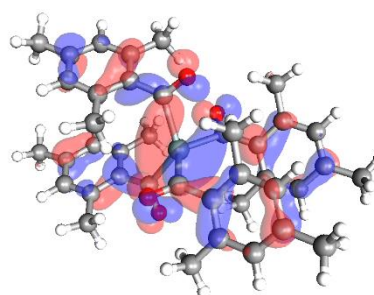

-7.61 eV

**HOMO-1**

**Figure S9:** HOMO-1, HOMO, LUMO and LUMO+1 together with orbital energies of **1a** at the PCM(CHCl<sub>3</sub>) TD-DFT CAM-B3LYP/LANL2DZdp-ECP(Sn),def2-TZVP(H,C,O)//B3LYP/LANL2DZdp-ECP(Sn),6-31+G(d)(H,C,O) level of theory.

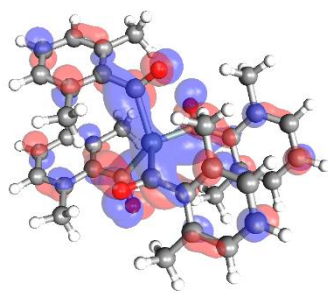

-0.70 eV  
**LUMO+1**

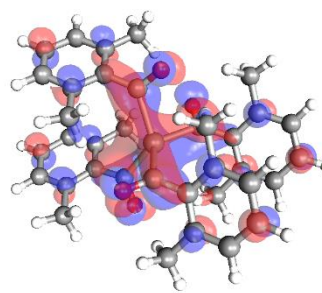

-1.02 eV  
**LUMO**

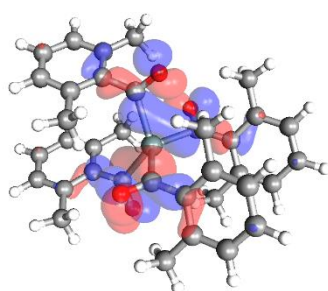

-7.59 eV  
**HOMO**

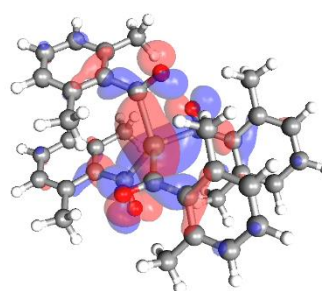

-7.76 eV  
**HOMO-1**

**Figure S10:** HOMO-1, HOMO, LUMO and LUMO+1 together with orbital energies of **1b** at the PCM(CHCl<sub>3</sub>) TD-DFT CAM-B3LYP/LANL2DZdp-ECP(Sn),def2-TZVP(H,C,O)//B3LYP/LANL2DZdp-ECP(Sn),6-31+G(d)(H,C,O) level of theory.

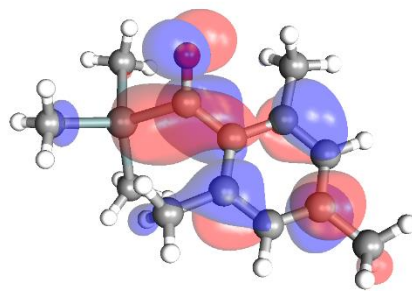

-0.42 eV

**LUMO**

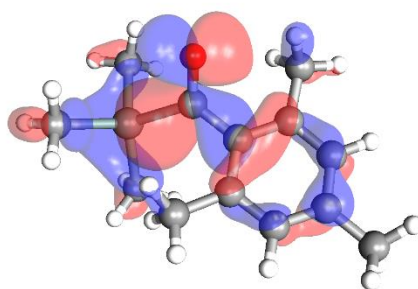

-7.54 eV

**HOMO**

**Figure S11:** HOMO and LUMO together with orbital energies of mesityltrimethylstannane at the PCM(CHCl<sub>3</sub>) TD-DFT CAM-B3LYP/LANL2DZdp-ECP(Sn),def2-TZVP(H,C,O)//B3LYP/LANL2DZdp-ECP(Sn),6-31+G(d)(H,C,O) level of theory.

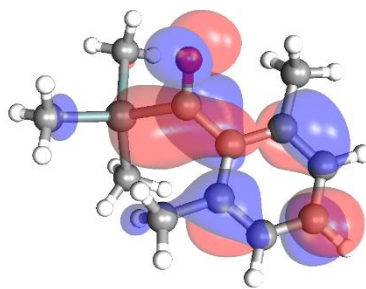

-0.46 eV

**LUMO**

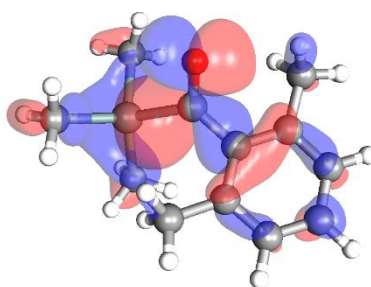

-7.60 eV

**HOMO**

**Figure S12:** HOMO and LUMO together with orbital energies of 2,6-dimethylbenzoyltrimethylstannane at the PCM(CHCl<sub>3</sub>) TD-DFT CAM-B3LYP/LANL2DZdp-ECP(Sn),def2-TZVP(H,C,O)//B3LYP/LANL2DZdp-ECP(Sn),6-31+G(d)(H,C,O) level of theory.

**Tabel S4:** NBO analysis of mesityltrimethylstannane at the PCM(CHCl<sub>3</sub>) TD-DFT CAM-B3LYP/LANL2DZdp-ECP(Sn),def2-TZVP(H,C,O)//B3LYP/LANL2DZdp-ECP(Sn),6-31+G(d)(H,C,O) level of theory.

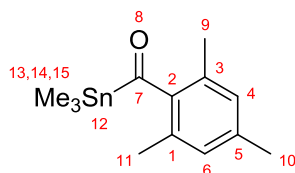

|          |   |      | %     | %s    | %p    | %d   | %f   | H.O.                                                    |
|----------|---|------|-------|-------|-------|------|------|---------------------------------------------------------|
| C1-C2    | □ | C1   | 49.18 | 34.02 | 65.83 | 0.14 | 0.01 | sp <sup>1.94</sup>                                      |
|          |   | C2   | 50.82 | 34.84 | 65.10 | 0.06 | 0.01 | sp <sup>1.87</sup>                                      |
| C1-C2    | □ | C1   | 45.70 | 0.00  | 99.92 | 0.04 | 0.03 | sp                                                      |
|          |   | C2   | 54.30 | 0.05  | 99.91 | 0.02 | 0.02 | sp <sup>99.99</sup> d <sup>0.28</sup> f <sup>0.37</sup> |
| C1-C6    | □ | C1   | 50.52 | 34.86 | 65.01 | 0.12 | 0.01 | sp <sup>1.86</sup>                                      |
|          |   | C6   | 49.48 | 35.95 | 63.90 | 0.14 | 0.01 | sp <sup>1.78</sup>                                      |
| C1-C11   | □ | C1   | 50.19 | 31.08 | 68.88 | 0.03 | 0.01 | sp <sup>2.22</sup>                                      |
|          |   | C11  | 49.81 | 29.46 | 70.33 | 0.19 | 0.01 | sp <sup>2.39</sup> d <sup>0.01</sup>                    |
| C2-C3    | □ | C2   | 50.98 | 34.95 | 64.99 | 0.06 | 0.01 | sp <sup>1.86</sup>                                      |
|          |   | C3   | 49.02 | 33.76 | 66.09 | 0.15 | 0.01 | sp <sup>1.96</sup>                                      |
| C2-C7    | □ | C2   | 53.02 | 30.09 | 69.80 | 0.09 | 0.02 | sp <sup>2.32</sup>                                      |
|          |   | C7   | 46.98 | 37.59 | 62.34 | 0.06 | 0.01 | sp <sup>1.66</sup>                                      |
| C3-C4    | □ | C3   | 50.39 | 34.62 | 65.25 | 0.12 | 0.01 | sp <sup>1.88</sup>                                      |
|          |   | C4   | 49.61 | 36.03 | 63.82 | 0.14 | 0.01 | sp <sup>1.77</sup>                                      |
| C3-C4    | □ | C3   | 46.54 | 0.00  | 99.93 | 0.04 | 0.03 | sp                                                      |
|          |   | C4   | 53.46 | 0.00  | 99.94 | 0.03 | 0.03 | sp                                                      |
| C3-C9    | □ | C3   | 50.59 | 31.59 | 68.38 | 0.03 | 0.01 | sp <sup>2.16</sup>                                      |
|          |   | C9   | 49.41 | 29.37 | 70.43 | 0.19 | 0.01 | sp <sup>2.40</sup>                                      |
| C4-C5    | □ | C4   | 49.65 | 35.81 | 64.01 | 0.16 | 0.01 | sp <sup>1.79</sup>                                      |
|          |   | C5   | 50.35 | 34.29 | 65.59 | 0.11 | 0.01 | sp <sup>1.91</sup>                                      |
| C5-C6    | □ | C5   | 50.29 | 34.24 | 65.64 | 0.11 | 0.01 | sp <sup>1.92</sup>                                      |
|          |   | C6   | 49.71 | 35.81 | 64.02 | 0.16 | 0.01 | sp <sup>1.79</sup>                                      |
| C5-C6    | □ | C5   | 46.64 | 0.01  | 99.94 | 0.04 | 0.02 | sp                                                      |
|          |   | C6   | 53.36 | 0.00  | 99.94 | 0.03 | 0.03 | sp                                                      |
| C5-C10   | □ | C5   | 50.43 | 31.43 | 68.53 | 0.04 | 0.01 | sp <sup>2.18</sup>                                      |
|          |   | C10  | 49.57 | 29.73 | 70.06 | 0.01 | 0.01 | sp <sup>2.36</sup> d <sup>0.01</sup>                    |
| C7-O8    | □ | C7   | 33.36 | 30.90 | 68.99 | 0.09 | 0.01 | sp <sup>2.23</sup>                                      |
|          |   | O8   | 66.64 | 42.77 | 56.62 | 0.59 | 0.02 | sp <sup>1.32</sup> d <sup>0.01</sup>                    |
| C7-O8    | □ | C7   | 31.34 | 0.76  | 99.09 | 0.14 | 0.01 | sp <sup>99.99</sup> d <sup>0.18</sup> f <sup>0.01</sup> |
|          |   | O8   | 68.66 | 0.56  | 99.05 | 0.37 | 0.02 | sp <sup>99.99</sup> d <sup>0.66</sup> f <sup>0.03</sup> |
| C7-Sn12  | □ | C7   | 74.91 | 31.31 | 68.65 | 0.04 | 0.01 | sp <sup>2.19</sup>                                      |
|          |   | Sn12 | 25.09 | 21.93 | 77.87 | 0.19 | -    | sp <sup>3.55</sup> d <sup>0.01</sup>                    |
| Sn12-C13 | □ | Sn12 | 24.56 | 26.11 | 73.79 | 0.10 | -    | sp <sup>2.83</sup>                                      |
|          |   | C13  | 75.44 | 26.02 | 73.94 | 0.03 | 0.00 | sp <sup>2.84</sup>                                      |
| Sn12-C14 | □ | Sn12 | 24.45 | 25.95 | 73.96 | 0.08 | -    | sp <sup>2.85</sup>                                      |
|          |   | C14  | 75.55 | 26.14 | 73.83 | 0.03 | 0.00 | sp <sup>2.82</sup>                                      |
| Sn12-C15 | □ | Sn12 | 24.33 | 26.01 | 73.85 | 0.14 | -    | sp <sup>2.84</sup> d <sup>0.01</sup>                    |
|          |   | C15  | 75.67 | 25.94 | 74.03 | 0.03 | 0.00 | sp <sup>2.85</sup>                                      |
| LP1      | - | O8   | -     | 56.50 | 43.39 | 0.10 | 0.00 | sp <sup>0.77</sup>                                      |
| LP2      | - | O8   | -     | 0.06  | 99.69 | 0.24 | 0.01 | sp <sup>99.99</sup> d <sup>4.03</sup> f <sup>0.22</sup> |

**Tabel S5:** NBO analysis of 2,6-dimethylbenzoyltrimethylstannane at the PCM(CHCl<sub>3</sub>) TD-DFT CAM-B3LYP/LANL2DZdp-ECP(Sn),def2-TZVP(H,C,O)//B3LYP/LANL2DZdp-ECP(Sn),6-31+G(d)(H,C,O) level of theory.

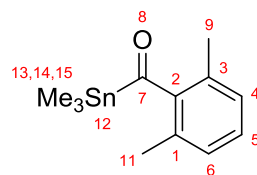

|          |   |      | %     | %s    | %p    | %d   | %f   | H.O.                                                    |
|----------|---|------|-------|-------|-------|------|------|---------------------------------------------------------|
| C1-C2    | □ | C1   | 49.15 | 33.96 | 65.89 | 0.14 | 0.01 | sp <sup>1.94</sup>                                      |
|          |   | C2   | 50.85 | 34.97 | 64.97 | 0.06 | 0.01 | sp <sup>1.86</sup>                                      |
| C1-C6    | □ | C1   | 50.69 | 34.80 | 65.08 | 0.11 | 0.01 | sp <sup>1.87</sup>                                      |
|          |   | C6   | 49.31 | 35.67 | 64.17 | 0.14 | 0.01 | sp <sup>1.80</sup>                                      |
| C1-C6    | □ | C1   | 47.81 | 0.00  | 99.93 | 0.04 | 0.03 | sp                                                      |
|          |   | C6   | 52.19 | 0.00  | 99.94 | 0.03 | 0.03 | sp                                                      |
| C1-C11   | □ | C1   | 50.24 | 31.19 | 68.77 | 0.03 | 0.01 | sp <sup>2.20</sup>                                      |
|          |   | C11  | 49.76 | 29.45 | 70.35 | 0.19 | 0.01 | sp <sup>2.39</sup> d <sup>0.01</sup>                    |
| C2-C3    | □ | C2   | 50.98 | 35.10 | 64.83 | 0.06 | 0.01 | sp <sup>1.85</sup>                                      |
|          |   | C3   | 49.02 | 33.73 | 66.12 | 0.14 | 0.01 | sp <sup>1.96</sup>                                      |
| C2-C3    | □ | C2   | 53.88 | 0.01  | 99.96 | 0.02 | 0.02 | sp                                                      |
|          |   | C3   | 46.12 | 0.00  | 99.92 | 0.05 | 0.03 | sp                                                      |
| C2-C7    | □ | C2   | 53.02 | 29.85 | 70.04 | 0.10 | 0.01 | sp <sup>2.35</sup>                                      |
|          |   | C7   | 46.98 | 37.40 | 62.53 | 0.06 | 0.01 | sp <sup>1.67</sup>                                      |
| C3-C4    | □ | C3   | 50.57 | 34.56 | 65.32 | 0.11 | 0.01 | sp <sup>1.89</sup>                                      |
|          |   | C4   | 49.43 | 35.75 | 64.10 | 0.14 | 0.01 | sp <sup>1.79</sup>                                      |
| C3-C9    | □ | C3   | 50.61 | 31.67 | 68.29 | 0.03 | 0.01 | sp <sup>2.16</sup>                                      |
|          |   | C9   | 49.39 | 29.34 | 70.46 | 0.19 | 0.01 | sp <sup>2.40</sup>                                      |
| C4-C5    | □ | C4   | 50.13 | 35.70 | 64.14 | 0.14 | 0.01 | sp <sup>1.80</sup>                                      |
|          |   | C5   | 49.87 | 35.69 | 64.18 | 0.12 | 0.01 | sp <sup>1.80</sup>                                      |
| C4-C5    | □ | C4   | 51.78 | 0.00  | 99.94 | 0.03 | 0.03 | sp                                                      |
|          |   | C5   | 48.22 | 0.00  | 99.95 | 0.03 | 0.02 | sp                                                      |
| C5-C6    | □ | C5   | 49.82 | 35.63 | 64.23 | 0.12 | 0.01 | sp <sup>1.80</sup>                                      |
|          |   | C6   | 50.18 | 35.69 | 64.16 | 0.14 | 0.01 | sp <sup>1.80</sup>                                      |
| C7-O8    | □ | C7   | 33.32 | 30.75 | 69.16 | 0.09 | 0.01 | sp <sup>2.25</sup>                                      |
|          |   | O8   | 66.68 | 42.65 | 56.75 | 0.59 | 0.01 | sp <sup>1.33</sup> d <sup>0.01</sup>                    |
| C7-O8    | □ | C7   | 31.52 | 0.94  | 98.91 | 0.14 | 0.01 | sp <sup>99.99</sup> d <sup>0.14</sup>                   |
|          |   | O8   | 68.48 | 0.75  | 98.86 | 0.37 | 0.02 | sp <sup>99.99</sup> d <sup>0.50</sup>                   |
|          |   |      |       |       |       |      |      |                                                         |
| C7-Sn12  | □ | C7   | 75.05 | 31.45 | 68.50 | 0.04 | 0.01 | sp <sup>2.18</sup>                                      |
|          |   | Sn12 | 24.95 | 21.80 | 78.03 | 0.17 | -    | sp <sup>3.58</sup> d <sup>0.01</sup>                    |
| Sn12-C13 | □ | Sn12 | 24.62 | 26.13 | 73.77 | 0.10 | -    | sp <sup>2.82</sup>                                      |
|          |   | C13  | 75.38 | 25.96 | 74.00 | 0.03 | 0.00 | sp <sup>2.85</sup>                                      |
| Sn12-C14 | □ | Sn12 | 24.51 | 25.97 | 73.95 | 0.08 | -    | sp <sup>2.85</sup>                                      |
|          |   | C14  | 75.49 | 26.08 | 73.89 | 0.03 | 0.00 | sp <sup>2.83</sup>                                      |
| Sn12-C15 | □ | Sn12 | 24.41 | 26.10 | 73.78 | 0.12 | -    | sp <sup>2.83</sup>                                      |
|          |   | C15  | 75.59 | 25.89 | 74.08 | 0.03 | 0.00 | sp <sup>2.86</sup>                                      |
| LP1      | - | O8   | -     | 56.45 | 43.45 | 0.10 | 0.00 | sp <sup>0.77</sup>                                      |
| LP2      | - | O8   | -     | 0.05  | 99.70 | 0.24 | 0.01 | sp <sup>99.99</sup> d <sup>5.01</sup> f <sup>0.28</sup> |

## References

- [1] A. B. Pangborn, M. A. Giardello, R. H. Grubbs, R. K. Rosen, F. J. Timmers, *Organometallics* **1996**, *15*, 1518.
- [2] a) L. R. Subramanian, G. Siegemund (Eds.) *Houben-Weyl Methods of Organic Chemistry Supplement: Organo-Fluorine Compounds Fluorinating Agents and Their Application in Organic Synthesis*. Introduction of Fluorine with Alkali Metal Fluorides, Including Ammonium Fluoride and Tetraalkylammonium Fluorides (Including Special Methods of Fluorinations, e.g., Phase Transfer Catalysis, Activation by Crown Ethers, Reagents Bound to Polymers), Thieme, Stuttgart, **1998**; b) U. G. H. Buerger, *Angew. Chem. Int. Ed.* **1968**, *7*, 212.
- [3] J. Radebner, A. Eibel, M. Leybold, C. Gorsche, L. Schuh, R. Fischer, A. Torvisco, D. Neshchadin, R. Geier, N. Moszner et al., *Angew. Chem. Int. Ed.* **2017**, *56*, 3103.
- [4] K. S. Anseth, C. M. Wang, C. N. Bowman, *Macromolecules* **1994**, *27*, 650.
- [5] a) G. Ullrich, B. Ganster, U. Salz, N. Moszner, R. Liska, *J. Polym. Sci. A Polym. Chem.* **2006**, *44*, 1686; b) M. K. Mishra, Y. Yagci, M. K. H. o. r. v. p. Mishra, *Handbook of vinyl polymers. Radical polymerization, process, and technology / editors, Munmaya Mishra and Yusuf Yagci*, Taylor & Francis, Boca Raton, FL, **2008**.
- [6] a) Bruker, *APEX2 and SAINT. version 5.03*. Bruker AXS Inc., Madison, Wisconsin, USA, **2012**; b) R. H. Blessing, *Acta Cryst.* **1995**, *51*, 33.
- [7] a) G. M. Sheldrick, *Acta Crystallogr., Sect. A: Found. Crystallogr.* **1990**, *A46*, 467; b) G. M. Sheldrick, *Acta Crystallogr., Sect. A: Found. Crystallogr.* **2008**, *64*, 112; c) G. M. Sheldrick, *Acta Crystallogr., Sect. A: Found. Adv.* **2015**, *71*, 3.
- [8] a) A. L. Spek, *J. Appl. Crystallogr.* **2003**, *36*, 7; b) A. L. Spek, *Acta Crystallogr., Sect. D: Biol. Crystallogr.* **2009**, *65*, 148.
- [9] M. J. Frisch, G. W. Trucks, H. B. Schlegel, G. E. Scuseria, M. A. Robb, J. R. Cheeseman, G. Scalmani, V. Barone, B. Mennucci, G. A. Petersson, H. Nakatsuji, M. Caricato, X. Li, H. P. Hratchian, A. F. Izmaylov, J. Bloino, G. Zheng, J. L. Sonnenberg, M. Hada, M. Ehara, K. Toyota, R. Fukuda, J. Hasegawa, M. Ishida, T. Nakajima, Y. Honda, O. Kitao, H. Nakai, T. Vreven, Jr. J. A. Montgomery, J. E. Peralta, F. Ogliaro, M. Bearpark, J. J. Heyd, E. Brothers, K. N. Kudin, N. Staroverov, T. V. Keith, R. Kobayashi, J. Normand, K. Raghavachari, A. Rendell, J. C. Burant, S. S. Iyengar, J. Tomasi, M. Cossi, N. Rega, J. M. Millam, M. Klene, J. E. Knox, J. B. Cross, V. Bakken, C. Adamo, J. Jaramillo, R. Gomperts, R. E. Stratmann, O. Yazyev, A. J. Austin, R. Cammi, C. Pomelli, J. W. Ochterski, R. L. Martin, K. Morokuma, V. G. Zakrzewski, G. A. Voth, P. Salvador, J. J. Dannenberg, S. Dapprich, A. D. Daniels, O. Farkas, J. B. Foresman, J. V. Ortiz, J. Cioslowski, D. J. Fox, Gaussian 09, Revision D.01; Gaussian, Inc.: Wallingford, CT, **2013**.
- [10] (a) A. D. Becke, *J. Chem. Phys.* **1993**, *98*, 1372. b) C. Lee, W. Yang, R. Parr, *Phys. Rev. B: Condens. Matter Mater. Phys.* **1988**, *37*, 785.
- [11] P. J. Hay, W. R. Wadt, *J. Chem. Phys.* **1985**, *82*, 270. b) P. J. Hay, W. R. Wadt, *J. Chem. Phys.* **1985**, *82*, 284. c) P. J. Hay, W. R. Wadt, *J. Chem. Phys.* **1985**, *82*, 299. (d) C. E. Check, T. O. Faust, J. M. Bailey, B. J. Wright, T. M. Gilbert, L. S. Sunderlin, *J. Phys. Chem. A* **2001**, *105*, 8111.



- [12] a) P. C. Hariharan, J. A. Pople, *Theor. Chim. Acta* **1973**, 28, 213. (b) W. J. Hehre, R. Ditchfield, J. A. Pople, *J. Chem. Phys.* **1972**, 56, 2257. c) R. Ditchfield, W. J. Hehre, J. A. Pople, *J. Chem. Phys.* **1971**, 54, 724.
- [13] T. Yanai, D. Tew, N. Handy, *Chem. Phys. Lett.* **2004**, 393, 51.
- [14] F. Weigend, R. Ahlrichs, *Phys. Chem. Chem. Phys.* **2005**, 7, 3297.
- [15] J. Tomasi, B. Mennucci, R. Cammi, *Chem. Rev.* **2005**, 105, 2999.
- [16] A. R. Allouche, *J. Comput. Chem.* **2011**, 32, 174.
